# Supplementary material for: Functionalized polyoxometalate microspheres ensure selective adsorption of phosphoproteins and glycoproteins
Source: Royal Society of Chemistry journal article supplement (doi:10.1039/d1cc00325a), 2021-01-01
Supplement: d1cc00325a1.pdf [file d1cc00325a1.pdf]

## Supporting Information

### **Functionalized Polyoxometalate Microspheres Ensure Selective Adsorption of Phosphoproteins and Glycoproteins**

Wang Xu, Jian-Fang Cao, Yan-Na Lin, Yang Shu\*, Jian-Hua Wang\*

Department of Chemistry, College of Sciences, Northeastern University, Shenyang  
110819, China

\*Corresponding Authors

E-mail address:

[shuyang@mail.neu.edu.cn](mailto:shuyang@mail.neu.edu.cn) (Y. Shu);

[jianhuajrz@mail.neu.edu.cn](mailto:jianhuajrz@mail.neu.edu.cn) (J.H. Wang).

Tel: +86 24 83688944; Fax: +86 24 83687659

## Chemicals and Reagents

Sodium tungstate dihydrate ( $\text{Na}_2\text{WO}_4 \cdot 2\text{H}_2\text{O}$ , >99.5%) and tetrabutylammonium bromide were purchased from Sinopharm Chemical Reagent Co. Ltd. (Shanghai, China). 3-isocyanatopropyltriethoxysilane and 3-aminophenylboronic acid (>98%) were achieved from Aladdin (Shanghai, China). Acetonitrile (ACN) and diethyl ether were obtained from Tianjin YongDa Chemical Reagent Co., Ltd. (Tianjin, China). Tris(hydroxymethyl)aminomethane (Tris, >99.5%) was the product from Dalian Meilun Biotechnology Co. Ltd. (Dalian, China).

$\beta$ -casein from bovine milk ( $\beta$ -ca, >98%,  $M_r$  26.6 kDa, pI 4.6-4.8), ovalbumin from chicken egg white (OVA, >98%,  $M_r$  44.3 kDa, pI 4.7),  $\gamma$ -globulin from bovine serum ( $\gamma$ -Glo,  $M_r$  150 kDa, pI 6.3-7.3), immunoglobulin G from human serum (IgG, >95%,  $M_r$  150.0 kDa, pI 6.95), transferrin human (Trf, >98%,  $M_r$  78 kDa, pI 5.2-5.9), bovine serum albumin (BSA, >98%,  $M_r$  66.4 kDa, pI 4.7-4.9), and cytochrome c (cyt-c,  $M_r$  12.4 kDa, pI 10.7) were obtained from Sigma-Aldrich (St Louis, USA). The protein molecular weight marker (Board, 3597A) was purchased from Takara Biotechnology Co., Ltd. Human serum sample of healthy volunteer was collected from the Hospital of Northeastern University.

All the reagents are at least of analytical-reagent grade and used without further purification. Deionized water of 18 M $\Omega$  cm was used throughout the experiments. In addition, all the experiments with human blood and serum samples were carried out in accordance with the current guidelines for the care of laboratory animals and were approved by Animal and Medical Ethics Committee of Northeastern University.

## Instrumentations

UV-vis absorption spectra were collected on a U-3900 UV-vis spectrophotometer (Hitachi High Technologies, Japan) and microplate reader (BioTek Instruments, Inc., USA). Fourier transform infrared spectra (FT-IR) were recorded in the solid state using potassium bromide pellets on a VERTEX 70 FT-IR spectrophotometer (Bruker, Germany) from 4000 to 400  $\text{cm}^{-1}$ . Thermogravimetric analysis (TGA) was carried out and recorded on a TGA/DSC3+ analyzer with a heating rate of 10  $^\circ\text{C}$  per min (25-800  $^\circ\text{C}$ ) under a continuous  $\text{N}_2$  flow (TGA, METTLER TOLEDO, Switzerland). X-ray diffraction (XRD) patterns were obtained on an Empyrean (BRUKER, Germany) with Cu  $K\alpha$  radiation at  $\lambda$  1.54  $\text{Å}$ . Scanning electron microscopy (SEM) images and energy

dispersive spectrum (EDS) were operated on a SU8010 scanning electron microscope (Hitachi High Technologies, Japan). Transmission electron microscopy (TEM) image was operated on a JEM2100PLUS transmission electron microscope (JEOL, Japan). X-ray photoelectron spectroscopy (XPS) measurements were progressed on a Thermo Scientific ESCALAB 250Xi electron spectrometer (Thermo Electron, America). Circular dichroism (CD) spectra were obtained on a MOS-450 (Bio-Logic, France) automatic recording spectropolarimeter with nitrogen protection.

### **Preparation of Si-APBA and PW<sub>9</sub>-Si-APBA microspheres**

The organosilicon reagent modified by boronic acid groups was first prepared. Shortly, 0.30 g of 3-aminophenylboronic acid (APBA) was dispersed in 50 mL acetonitrile (ACN) and then 500  $\mu$ L of 3-isocyanatopropyltriethoxysilane was added. The reaction mixture was stirred for 24 h at 80°C. Afterwards, the boronic acid modified silylating linker Si-APBA was obtained by centrifugation at 8000 rpm for 10 min followed by washing with ethyl alcohol.

The lacunary polyoxometalate Na<sub>9</sub>[ $\alpha$ -PW<sub>9</sub>O<sub>34</sub>] $\cdot$ xH<sub>2</sub>O (PW<sub>9</sub>) was prepared by following a previous procedure<sup>1</sup>. Thereafter, 1.27 g of PW<sub>9</sub> was dispersed to 22 mL of H<sub>2</sub>O/ACN (1:10 v/v), and 0.62 g of tetrabutylammonium bromide was added under vigorous stirring. Then 475  $\mu$ L of the above prepared silylating linker Si-APBA and 1.44 mL of HCl (4 mol L<sup>-1</sup>) were added consecutively. The reaction mixture was allowed to stand for 12 h at room temperature under vigorous stirring. Afterwards, the insoluble material was removed by filtration. The filtrate was evaporated to dryness at 50°C and re-dispersed in 2.0 mL acetonitrile. The product precipitated by adding 40 mL DI water and then collected by centrifugation at 8000 rpm for 5 min. After washing with DI water and diethyl ether alternatively for three times, the final product was obtained by natural drying.

The synthesis process of PW<sub>9</sub>-Si hybrid complies with the PW<sub>9</sub>-Si-APBA microspheres. The difference is that 3-isocyanatopropyltriethoxysilane was used directly instead of Si-APBA.

### **Protein adsorption by PW<sub>9</sub>-Si-APBA microspheres**

20  $\mu\text{L}$  of PW<sub>9</sub>-Si-APBA microspheres aqueous suspension (10 mg mL<sup>-1</sup>) was added into a mixture containing 20  $\mu\text{L}$  of protein solution (1.0 mg mL<sup>-1</sup>) and 160  $\mu\text{L}$  of Britton–Robinson (BR) buffer (40 mmol L<sup>-1</sup>, pH 5.0). The adsorption progress was carried out under oscillating for 20 min at room temperature. PW<sub>9</sub>-Si-APBA microspheres with adsorbed proteins were collected by centrifugation at 6000 rpm for 5 min. 200  $\mu\text{L}$  of Tris-HCl buffer (pH 8.0, 0.1 mol L<sup>-1</sup>) was used as stripping reagent to recover the retained proteins with shaking for 20 min, and then the recovered solution was obtained followed by centrifugation at 6000 rpm for 5 min. The quantification of recovered protein was performed by UV-vis absorption spectrophotometry and microplate reader by recording the characteristic absorption of proteins (410 nm for cyt-c, 595 nm for  $\beta$ -ca, OVA, IgG,  $\gamma$ -Glo, Trf, and BSA, staining with Coomassie brilliant blue).

### **The adsorption isotherms of proteins**

To evaluate the enrichment capacity of PW<sub>9</sub>-Si-APBA microsphere toward phosphoproteins and glycoproteins, 0.10 mg of PW<sub>9</sub>-Si-APBA was used for adsorption of proteins in a range of 60-700  $\mu\text{g mL}^{-1}$  (200  $\mu\text{L}$ , 40 mmol L<sup>-1</sup> BR buffer, pH 5.0). The adsorption capacity  $Q_e$  (mg g<sup>-1</sup>) was calculated according to the follow equation.  $C_0$  (mg mL<sup>-1</sup>) is the initial concentration of protein,  $C_e$  (mg mL<sup>-1</sup>) is the equilibrium concentration of protein after extraction,  $V$  (mL) is the volume of adsorption system and  $m$  (mg) is the mass of PW<sub>9</sub>-Si-APBA microspheres.

$$Q_e = \frac{(C_0 - C_e) V}{10^{-3} m} \quad (1)$$

### **Simultaneous adsorption of phosphoproteins and glycoproteins from protein mixture**

The model protein mixture with a mass ratio of  $\beta$ -ca/OVA/IgG/BSA ranging from 1:1:1:1 to 1:1:1:200 was prepared. The concentration of  $\beta$ -ca, OVA and IgG kept constant at 200  $\mu\text{g mL}^{-1}$ , and the concentration of BSA varied from 200  $\mu\text{g mL}^{-1}$  to 40 mg mL<sup>-1</sup>. 30  $\mu\text{L}$  of PW<sub>9</sub>-Si-APBA microspheres aqueous suspension (10 mg mL<sup>-1</sup>) was taken to mix with 170  $\mu\text{L}$  of different mass ratios of protein mixture (40 mmol L<sup>-1</sup> BR buffer, pH 5.0). The adsorption and stripping of proteins are performed by following the above procedure. All the supernatant fractions after adsorption and stripping/elution were lyophilized for further analysis by Sodium Dodecyl Sulfate

Polyacrylamide Gel Electrophoresis (SDS-PAGE).

### **Simultaneous adsorption of phosphoproteins and glycoproteins from human serum**

3  $\mu\text{L}$  of human serum was diluted 100-fold with 222  $\mu\text{L}$  BR buffer (40  $\text{mmol L}^{-1}$ , pH 5.0) and 75  $\mu\text{L}$  standard  $\beta$ -ca solution (2  $\text{mg mL}^{-1}$ ). The above mixture solution was incubated with 1.0 mg  $\text{PW}_9\text{-Si-APBA}$  microspheres and oscillated for 20 min. After centrifugation at 6000 rpm for 5 min, the supernatant was collected. The loosely retained proteins on the surface of  $\text{PW}_9\text{-Si-APBA}$  microspheres were eliminated by washing for 2 times with 50  $\mu\text{L}$  of BR buffer (40  $\text{mmol L}^{-1}$ , pH 5.0). Subsequently, 200  $\mu\text{L}$  of Tris-HCl buffer (0.1  $\text{mol L}^{-1}$ , pH 8.0) was added to release the retained phosphoproteins and glycoproteins from  $\text{PW}_9\text{-Si-APBA}$  by vibration for 20 min. After centrifugation at 6000 rpm for 5 min, the stripped protein solution was collected, lyophilized and redissolved in 150  $\mu\text{L}$  water for SDS-PAGE analysis.

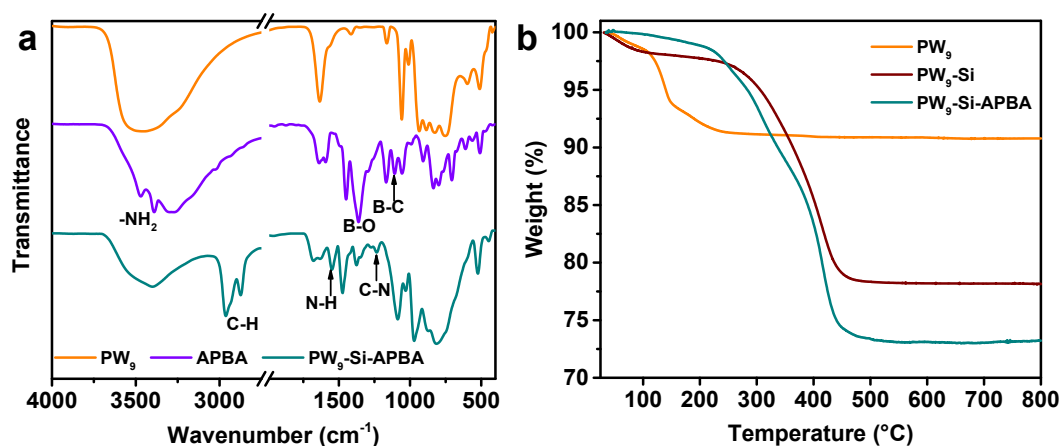

Figure S1. FT-IR spectra of  $PW_9$ , APBA, and  $PW_9$ -Si-APBA microspheres (a); TGA curves of  $PW_9$ ,  $PW_9$ -Si, and  $PW_9$ -Si-APBA microspheres (b)

TGA analysis indicated 8.7% weight loss of crystallization water in  $PW_9$  within 30-250°C ( $Na_9[\alpha-PW_9O_{34}] \cdot xH_2O$ ,  $x = 13$  based on TGA analysis) (Figure S1b). The formation of  $PW_9$ -Si &  $PW_9$ -Si-APBA reduced the crystallization water to 2.8% (30-250°C) and 1.5% (30-220°C), respectively. Decomposition of organosilicon & organic ammonium increased weight loss to 18.5% (250-460°C) for  $PW_9$ -Si. 22.9% weight loss for  $PW_9$ -Si-APBA at 220-470°C is the decomposition of organosilicon, organic ammonium and APBA.

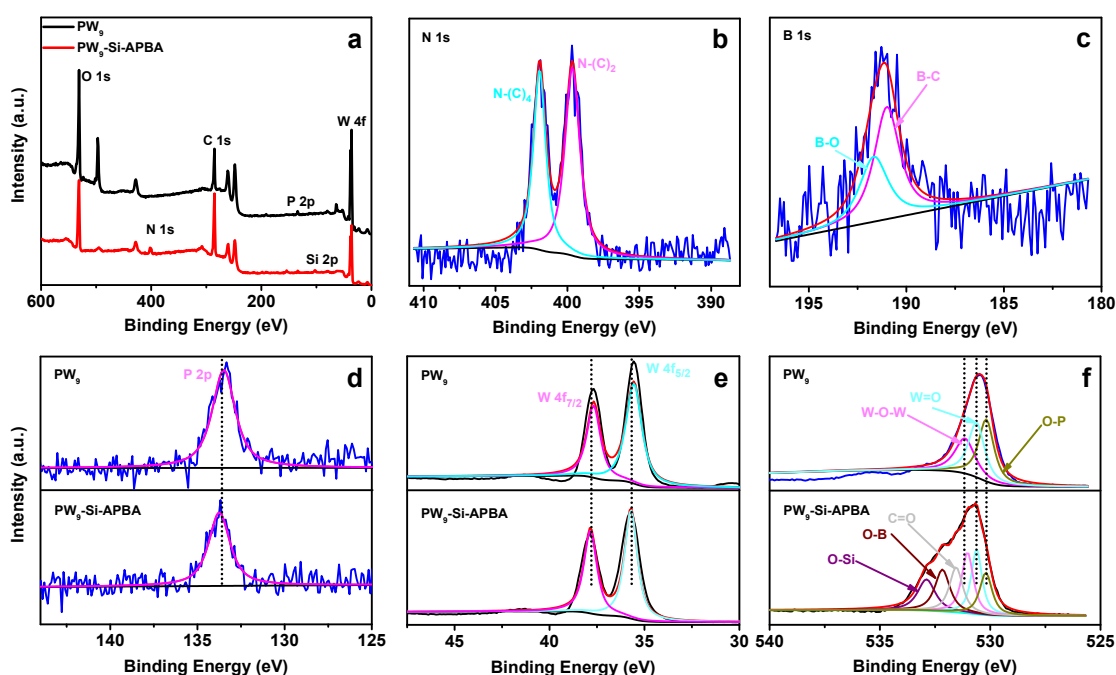

Figure S2. The full range XPS spectra of  $PW_9$  and  $PW_9$ -Si-APBA microspheres (a); The narrow range high-resolution XPS spectra of N 1s (b) and B 1s (c) of  $PW_9$ -Si-APBA microspheres, P 2p (d), W 4f (e) and O 1s (f) of  $PW_9$  and  $PW_9$ -Si-APBA microspheres.

X-ray photoelectron spectra (XPS) in Figure S2a indicated two new peaks for Si 2p (102.1 eV) and N 1s (400.1 eV) for  $PW_9$ -Si-APBA compared to  $PW_9$ . Figure S2b showed that N 1s spectrum is deconvoluted into two peaks at 401.9 eV (N-(C)<sub>4</sub>) and 399.7 eV (N-(C)<sub>2</sub>)<sup>2</sup>, due to the binding of organosilicon with  $PW_9$ . Figure S2c exhibited two peaks of B 1s for B-C (190.9 eV) and B-O (191.7 eV) in  $PW_9$ -Si-APBA<sup>3</sup>. With respect to O 1s spectrum of  $PW_9$ ,  $PW_9$ -Si-APBA produces two new peaks of O-Si (532.9 eV) and O-B (531.2 eV) (Figure S2f). P 2p and W 4f showed no change after binding with Si-APBA<sup>4,5</sup>, implying the maintainance of the primary structure of  $PW_9$  moiety in  $PW_9$ -Si-APBA (Figure S2d,e). This further verified the integration of boronic acid modified organosilicon linker with  $PW_9$  moiety.

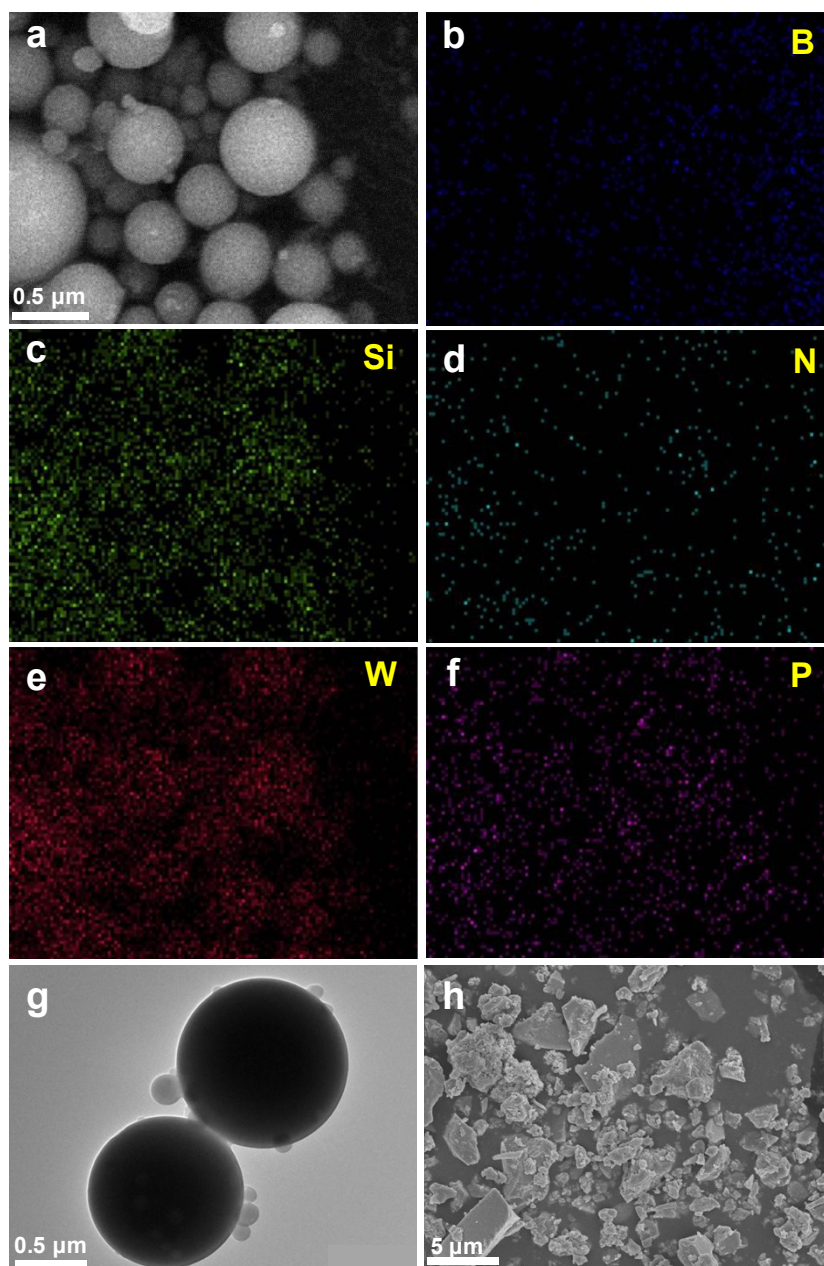

Figure S3. SEM image of  $\text{PW}_9\text{-Si-APBA}$  (a) and the corresponding EDS elemental mapping results of (b) B, (c) Si, (d) N, (e) W, and (f) P. TEM image of  $\text{PW}_9\text{-Si-APBA}$  (g). SEM image of  $\text{PW}_9\text{-Si}$  (h).



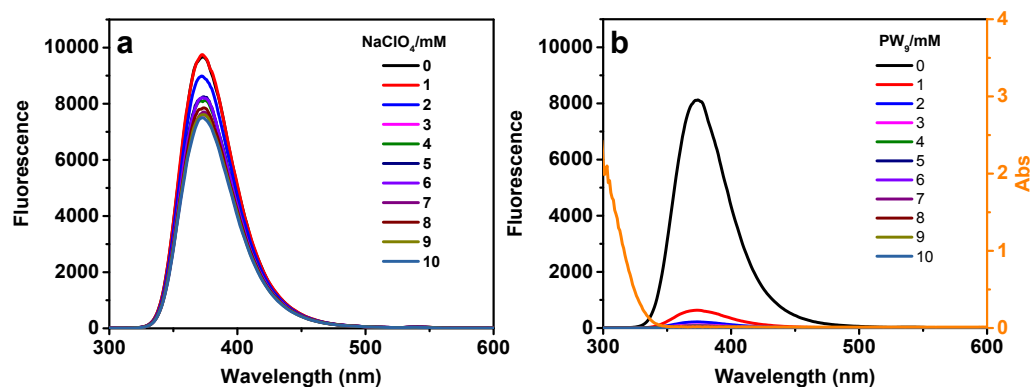

Figure S4. Fluorescence spectra at  $\lambda_{\text{ex}}/\lambda_{\text{em}}=270/370$  nm for a 10 mM APBA solution with the presence of  $\text{NaClO}_4$  (a) or  $\text{PW}_9$  (b) within a range of 0-10  $\text{mmol L}^{-1}$ . The orange color line in (b) is the adsorption spectrum of 1.0  $\text{mmol L}^{-1}$   $\text{PW}_9$  solution.

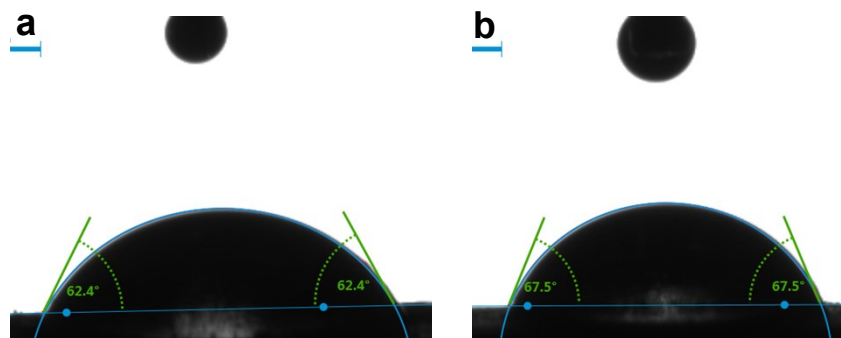

Figure S5. The contact angles of  $\text{PW}_9\text{-Si}$  (a) and  $\text{PW}_9\text{-Si-APBA}$  (b).

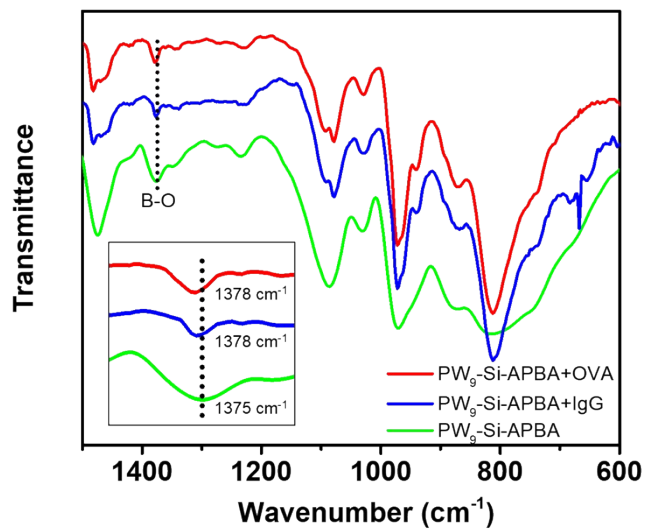

Figure S6. FT-IR spectra of PW<sub>9</sub>-Si-APBA before and after the adsorption of glycoproteins, i.e., OVA and IgG.

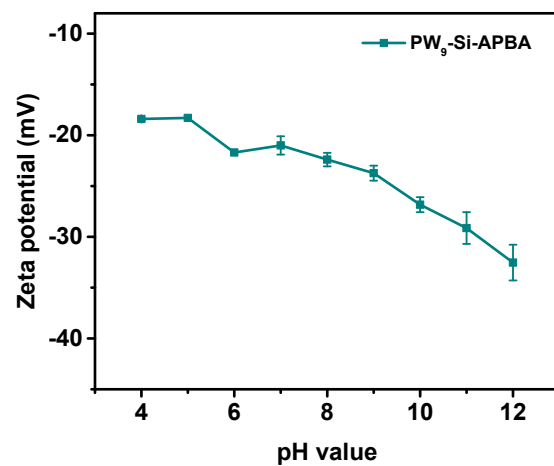

Figure S7. The zeta potentials of PW<sub>9</sub>-Si and PW<sub>9</sub>-Si-APBA within a range of pH 4.0-12.0. Mass of the material: 1.0 mg mL<sup>-1</sup>, BR buffer 40 mmol L<sup>-1</sup>.

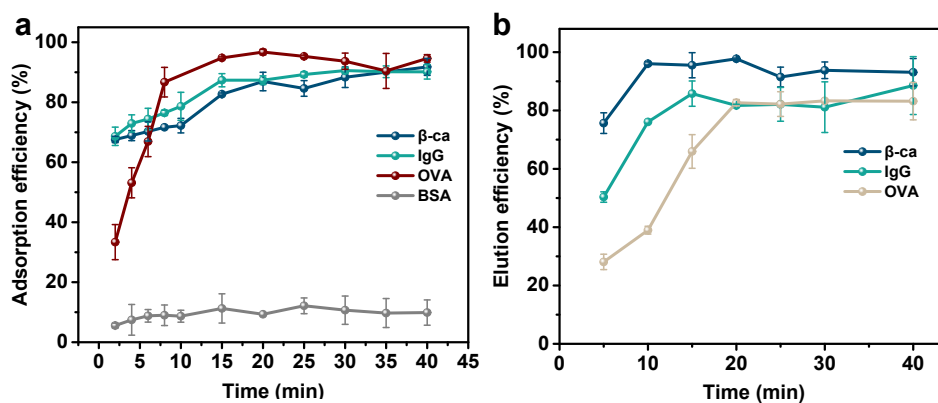

Figure S8. (a) Adsorption kinetics of  $\beta$ -ca, OVA, IgG and BSA on PW<sub>9</sub>-Si-APBA microspheres. (b) The elution kinetics for  $\beta$ -ca, OVA and IgG from PW<sub>9</sub>-Si-APBA microspheres. Protein solution: 100  $\mu\text{g mL}^{-1}$ , 200  $\mu\text{L}$ ; PW<sub>9</sub>-Si-APBA: 0.2 mg; BR buffer: 40 mmol L<sup>-1</sup>, pH 5.0; Adsorption time: 2-40 min (a), 20 min (b); Stripping agent: 200  $\mu\text{L}$ . Stripping time: 5-40 min.

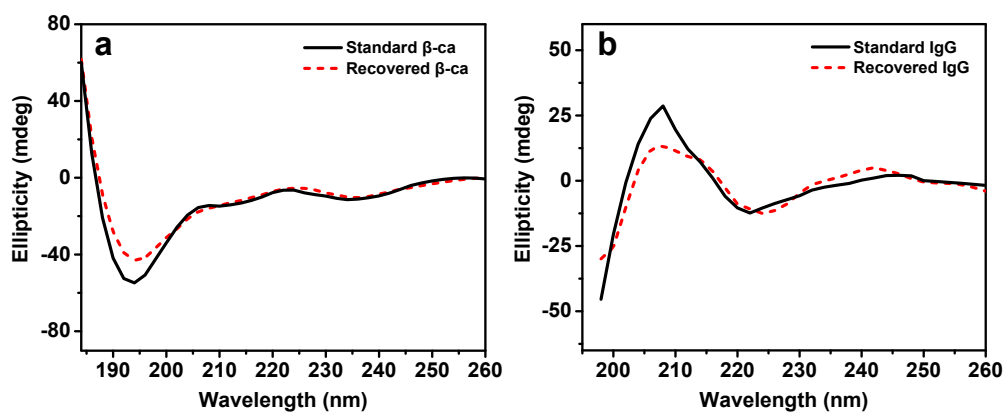

Figure S9. CD spectra of  $\beta$ -ca (a) and IgG (b). The recovered proteins were compared with their native counterparts in Tris-HCl buffer ( $0.1 \text{ mol L}^{-1}$ , pH 8.0).

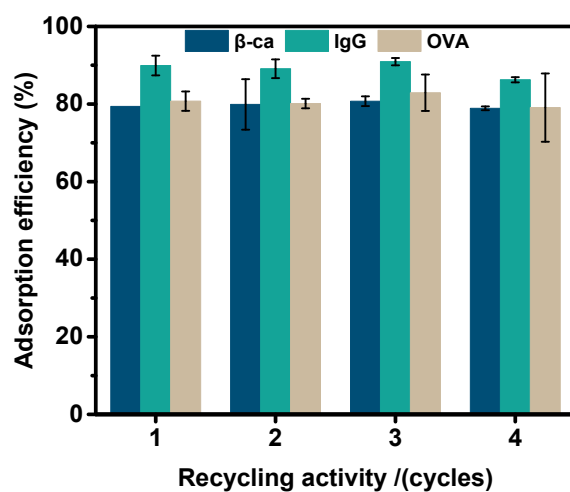

Figure S10. The recyclable performance of PW<sub>9</sub>-Si-APBA for the adsorption of phosphoproteins and glycoproteins. Protein solution: 100 μg mL<sup>-1</sup>, 200 μL; PW<sub>9</sub>-Si-APBA: 0.2 mg; Adsorption time: 20 min; BR buffer: 40 mmol L<sup>-1</sup>, pH 5.0; The stripping agent: Tris-HCl buffer (200 μL, 0.1 mol L<sup>-1</sup>, pH 8.0); Stripping time: 20 min.

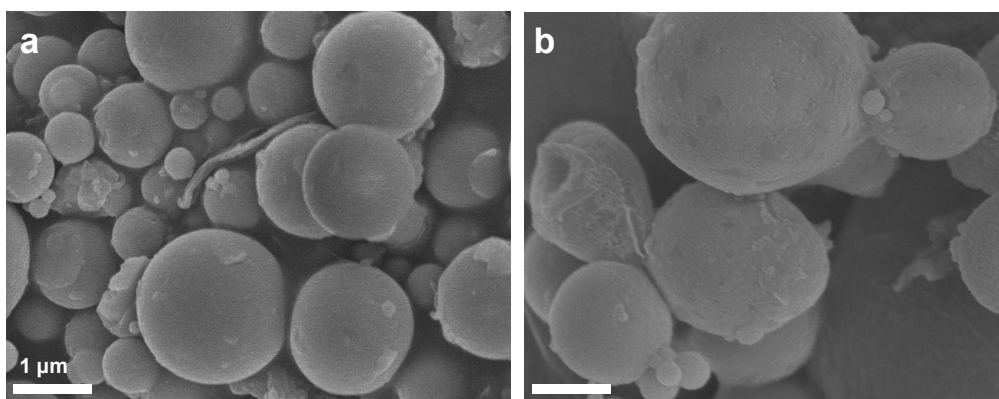

Figure S11. SEM images illustrating the spherical morphology of the  $PW_9$ -Si-APBA after the first (a) and the second (b) run of adsorption for the model protein of OVA serving as both phosphoprotein and glycoprotein.



Table S1. A comparison of the adsorption capacities and adsorption time for phosphoproteins and glycoproteins by PW<sub>9</sub>-Si-APBA microspheres with respect to various adsorbents.

| Adsorbent                                     | Target protein | Sorption capacity (mg/g) | Sorption Time | Ref       |
|-----------------------------------------------|----------------|--------------------------|---------------|-----------|
| Si@pNIPAm-b-pBA                               | OVA            | 98.0                     | 4 h           | 6         |
| GO-APBA/MIPs                                  | OVA            | 278                      | 40 min        | 7         |
| B-TiO <sub>2</sub> NPs                        | OVA            | 53.0                     | 2 h           | 8         |
| P(AAPBA-AM@NIPAM-St)CCS                       | OVA            | 150                      | 20 min        | 9         |
| M-β-CD@PDES                                   | OVA            | 151.62                   | 100 min       | 10        |
| pA-Mag(SiO <sub>2</sub> )                     | IgG            | 30                       | 1 h           | 11        |
| SPSDVB-PAA-PEI-P <sub>5</sub> W <sub>30</sub> | IgG            | 110.2                    | 30 min        | 12        |
| Co-MOF-OH                                     | IgG            | 158.0                    | 30 min        | 13        |
| Alg-SSF                                       | IgG            | 175                      | 1 h           | 14        |
| CeO <sub>2</sub>                              | β-ca           | 82.4                     | 30 min        | 15        |
| BT-PolyNIPAm-co-GMA-OH-Fe                     | β-ca           | 664                      | 30 min        | 16        |
| UiO@CmeimCl,UiO-66-NH <sub>2</sub>            | β-ca           | 588,<br>625              | 30 min        | 17        |
| PW <sub>9</sub> -Si-APBA                      | OVA            | 684.4                    | 20 min        | This work |
|                                               | IgG            | 393.5                    |               |           |
|                                               | β-ca           | 654.3                    |               |           |

## REFERENCES

- 1 Ginsberg, A. P., Vanadium(V) substituted dodecatungstophosphates. *Inorganic Syntheses*, 1990, **27**, 96-104, DOI: 10.1002/9780470132586.ch17.
- 2 M. Laurans, K. Trinh, K. Dalla Francesca, G. Izzet, S. Alves, E. Derat, V. Humblot, O. Pluchery, D. Vuillaume, S. Lenfant, F. Volatron and A. Proust, *ACS Appl. Mater. Interfaces*, 2020, **12**, 48109-48123.
- 3 M. Thiruppathi, P. Y. Lin, Y. T. Chou, H. Y. Ho, L. C. Wu and J. A. A. Ho, *Talanta*, 2019, **200**, 450-457.
- 4 S. Zhao, X. Zhao, H. Zhang, J. Li and Y.F. Zhu, *Nano Energy*, 2017, **35**, 405-414.
- 5 O. Makrygenni, D. Brouri, A. Proust, F. Launay and R. Villanneau, *Micropor. Mat.*, 2019, **278**, 314-321.
- 6 L. D. Jiang, M. E. Messing and L. Ye, *ACS Appl. Mater. Interfaces*, 2017, **9**, 8985-8995.
- 7 J. Luo, J. Huang, J. J. Cong, W. Wei and X. Y. Liu, *ACS Appl. Mater. Interfaces*, 2017, **9**, 7735-7744.
- 8 S. X. Jin, L. P. Liu and P. Zhou, Amorphous titania modified with boric acid for selective capture of glycoproteins, *Microchim. Acta*, 2018, **185**, 308-314.
- 9 Y. X. Chen, J. X. Tong, J. H. Dong, J. Luo and X. Y. Liu, *Small*, 2019, **15**, 1900099.
- 10 Y. Y. Qian, K. J. Xu, R. Ni and Y. Z. Wang, *Sep. Purif. Technol.*, 2021, **164**, 118422.
- 11 K. Salimi, D. D. Usta, I. Kocer, E. Celik and A. Tuncel, *Int. J. Biol. Macromol.*, 2018, **111**, 178-185.
- 12 M. M. Wang, S. Chen, Y. L. Yu and J.H. Wang, *Chem. Commun.*, 2020, **56**, 9870-9873.
- 13 Z. J. Hu, J. Meng, X. M. Wang, W. T. Li and X.W. Chen, *ACS Appl. Mater. Interfaces*, 2020, **12**, 55453-55459.
- 14 M. Sharma, A. P. M. Tavares, J. C.F. Nunes, N. Singh, D. Mondal, M. C. Neves, K. Prasad and M. G. Freire, *Green Chem.*, 2020, **22**, 2225-2233.

- 15 D. Yildirim, B. Gokcal, E. Buber, C. Kip, M. C. Demir and A. Tuncel, *Chem. Eng. J.*, 2021, **403**, 126357-126366.
- 16 P. F. Guo, H. Y. Gong, H. W. Zheng, M. L. Chen, J. H. Wang and L. Ye, *Colloids Surf. B Biointerfaces*, 2020, **196**,111282.
- 17 Y. Y. Zhang, W. Xu, J. F. Cao, Y. Shu and J. H.Wang, *Anal. Chim. Acta*, 2021, **1147**, 144-154.
